# Supplementary material
Source: Springer Nature journal article supplement (https://www.springermedizin.de/resource/supplementary/13019_2009_213_MOESM4_ESM.pdf/9638086)

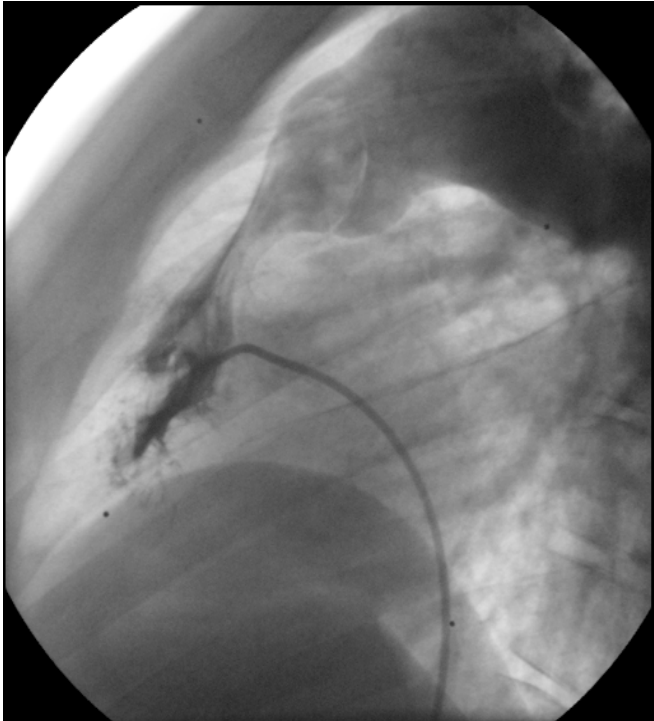

Supplement: MOESM4 [file 9638086]
